# Supplementary material for: Inline and continuous gas monitoring ingastrointestinal tract models with carbonnanotube-based chemiresistive sensors
Source: Research Square preprint supplement (doi:10.21203/rs.3.rs-3327957/v1), 2023-09-11
Supplement: Supplementary file 1 [file d9942ec1c17e1b457caa97a9.pdf]

# **Inline and continuous gas monitoring in gastrointestinal tract models with carbon nanotube-based chemiresistive sensors**

**Sahira Vasquez<sup>1,\*</sup>, Martina Aurora Costa Angeli<sup>1</sup>, Andrea Polo<sup>2</sup>, Alice Costantini<sup>2</sup>, Mattia Petrelli<sup>1</sup>, Enrico Avancini<sup>1</sup>, Raffaella Di Cagno<sup>2</sup>, Marco Gobbetti<sup>2</sup>, Andrea Gaiardo<sup>3</sup>, Matteo Valt<sup>3</sup>, Paolo Lugli<sup>1</sup>, and Luisa Petti<sup>1,\*</sup>**

<sup>1</sup>Sensing Technologies Laboratory (STL), Faculty of Engineering, Free University of Bozen-Bolzano, 39100, Bolzano, Italy

<sup>2</sup>Micro4Food Lab, Faculty of Agricultural, Food, and Environmental Sciences, Free University of Bozen-Bolzano, 39100, Bolzano, Italy

<sup>3</sup>Micro Nano Facility, Bruno Kessler Foundation, 38123 Trento, Italy

\* Corresponding author. E-mail:svasquezbaz@unibz.it, luisa.petti@unibz.it

## **SUPPLEMENTARY INFORMATION**

## S1 Sensor supplementary data

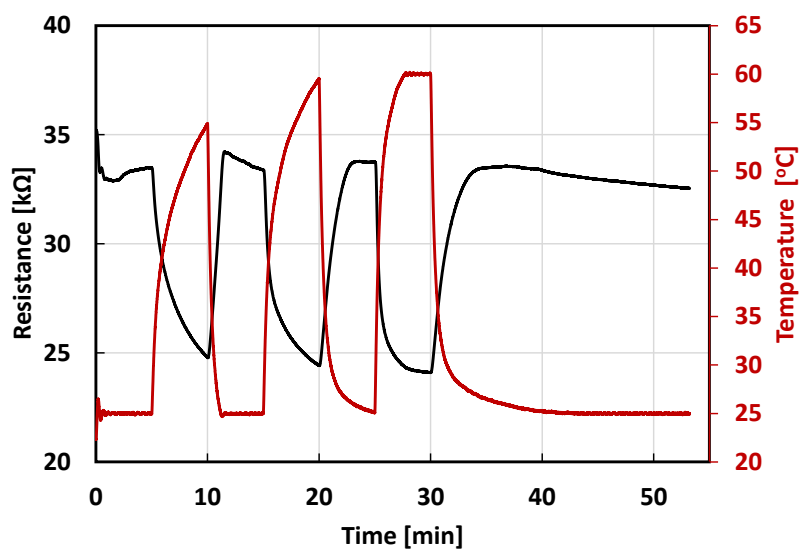

**Figure S1.** Resistance vs time at five minutes alternating temperature cycle of 25°C and 60°C, respectively. This cycle was performed on all sensors every day prior to the exposure to the gases.

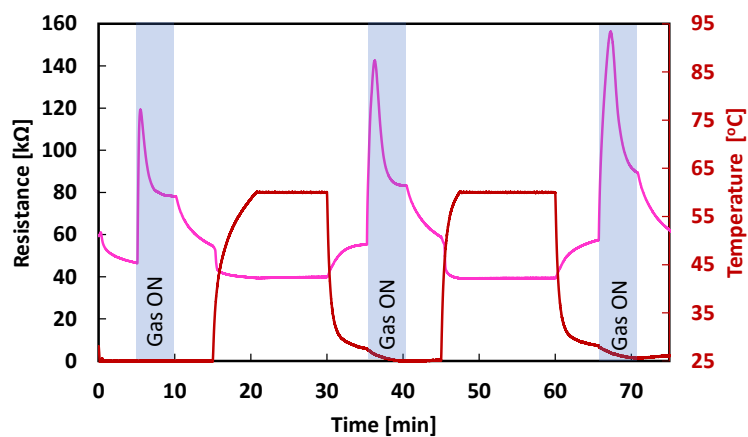

**Figure S2.** Short test: resistance vs. time when performing active sensing and recovery of the PDMS coated CNTs sensor at day 4.

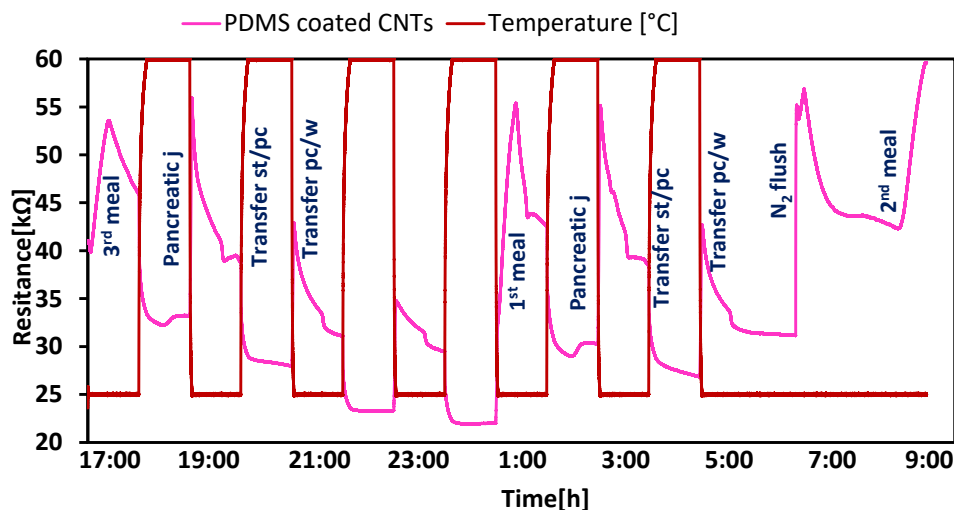

**Figure S3.** Resistance vs. time when performing passive sensing with recovery of one PDMS coated CNTs sensor at day 6.

## S2 Gas analysis supplementary data

Though a very low molecule fragmentation is expected during the protonation and subsequent acceleration of the molecules in the PTR-TOFMS, a high concentration of VOCs can lead to the appearance of  $C_2H_2^+$  ( $m/z = 26$ ),  $C_2H_3^+$  ( $m/z = 27$ ),  $C_2H_4^+$  ( $m/z = 28$ ) and  $C_2H_5^+$  ( $m/z = 29$ ) fragments (Fig. S4b). Furthermore, the peak at 29  $m/z$  is also probably indicative of the presence of ethylene ( $C_2H_4$ ) in the SHIME sample, which will be protonated to  $C_2H_5^+$ . Fig. S4c shows the peaks at  $m/z = 30$ . As can be seen, in both the SHIME sample and reference there is the presence of  $NO^+$  peak at  $m/z = 30.006$ . Furthermore, in the SHIME sample, a peak appears at  $m/z = 30.34$ , probably due to the presence of methylene imine ( $CH_3NH^+$ ). In the SHIME sample, peaks related to formaldehyde ( $CH_2OH^+$ ,  $m/z = 31$ ) and methanol ( $CH_3OH_2^+$ ,  $m/z = 33$ ) are clearly evident (Fig. S4d). On the contrary, the peak related to  $O_2$  ( $O_2^+$ ,  $m/z = 32$ ) is more prominent in the reference. The low intensity of the  $O_2^+$  peak suggests that it probably belongs to the ion source ( $H_2O/H_3O^+$ ) instead of being present in the SHIME sample. Fig. S5a highlights the presence of both protonated formic acid ( $CH_2O_2H^+$ ,  $m/z = 47.014$ ) and protonated ethanol ( $C_2H_6OH^+$ ,  $m/z = 47.049$ ) in the SHIME sample. On the other hand, Fig. S5b shows the presence of both propylamine ( $C_3H_9NH^+$ ,  $m/z = 60$ ) and acetic acid ( $C_2H_4O_2H^+$ ,  $m/z = 61$ ) in the SHIME sample, but with an intensity of the peaks that are comparable to the reference. An intense peak related to dimethyl sulfide ( $C_2H_6SH^+$ ) has been also identified in the SHIME sample (Fig. S5c). In addition to formic and acetic acids, other carboxylic acids have been identified in the SHIME sample, pentanoic acid (Fig. S5d), hexanoic acid (Fig. S6a) and heptanoic (Fig. S6b). Other VOCs are well identified in the SHIME sample with the PTR-TOFMS analysis, including terpenes (e.g. isoprene and pinene/limonene, Fig. S6c,d) and benzene derivatives (e.g. styrene trimethyl benzene/ethyl toluene, Fig. S7a,b).

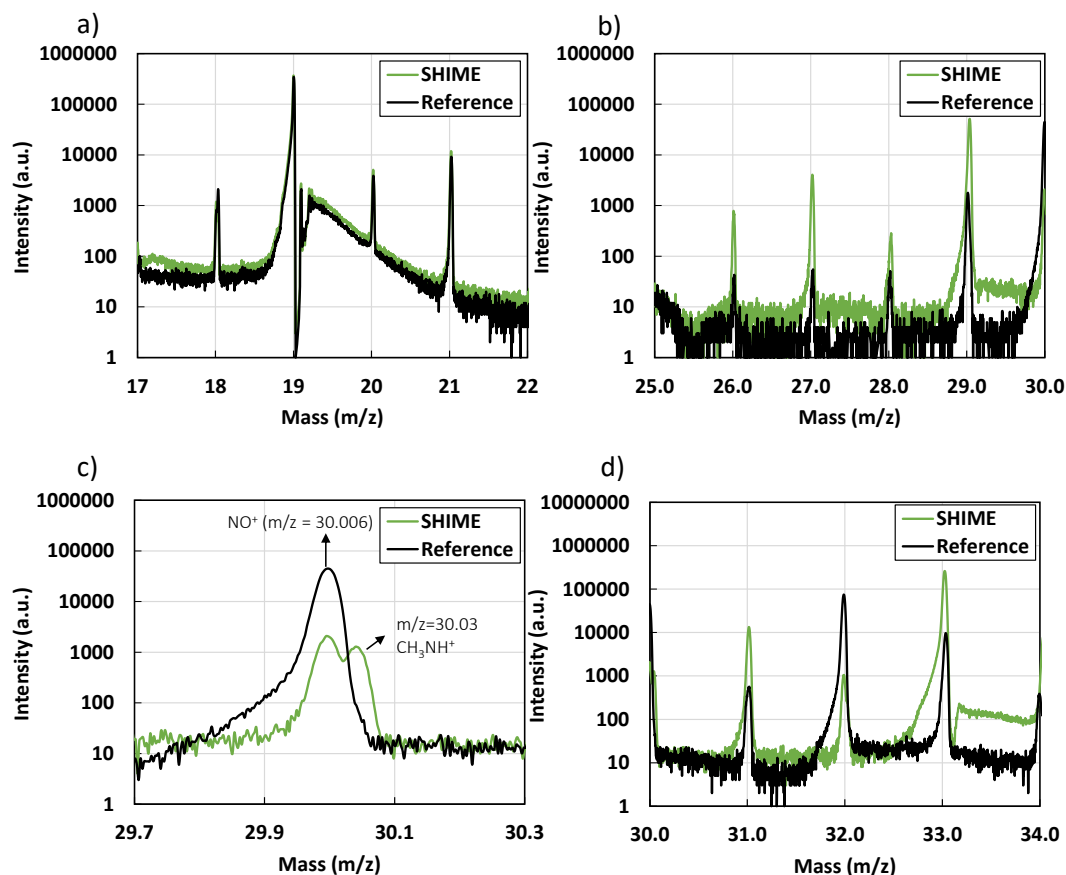

**Figure S4.** (a)  $H_3O^+$  ( $m/z = 19$ ) and related satellite peaks (18, 20, and 21), (b) VOCs fragments:  $C_2H_2^+$  ( $m/z = 26$ ),  $C_2H_3^+$  ( $m/z = 27$ ),  $C_2H_4^+$  ( $m/z = 28$ ) and  $C_2H_5^+$  ( $m/z = 29$ ). The peak at 29  $m/z$  is also probably indicative of the presence of ethylene ( $C_2H_4$ ) in the sample, (c)  $NO^+$  ( $m/z = 30.006$ ) and  $CH_3NH^+$  peaks, (d) formaldehyde ( $CH_2OH^+$ ,  $m/z = 31$ ),  $O_2$  ( $O_2^+$ ,  $m/z = 32$ ) and methanol ( $CH_3OH_2^+$ ,  $m/z = 33$ ) peaks



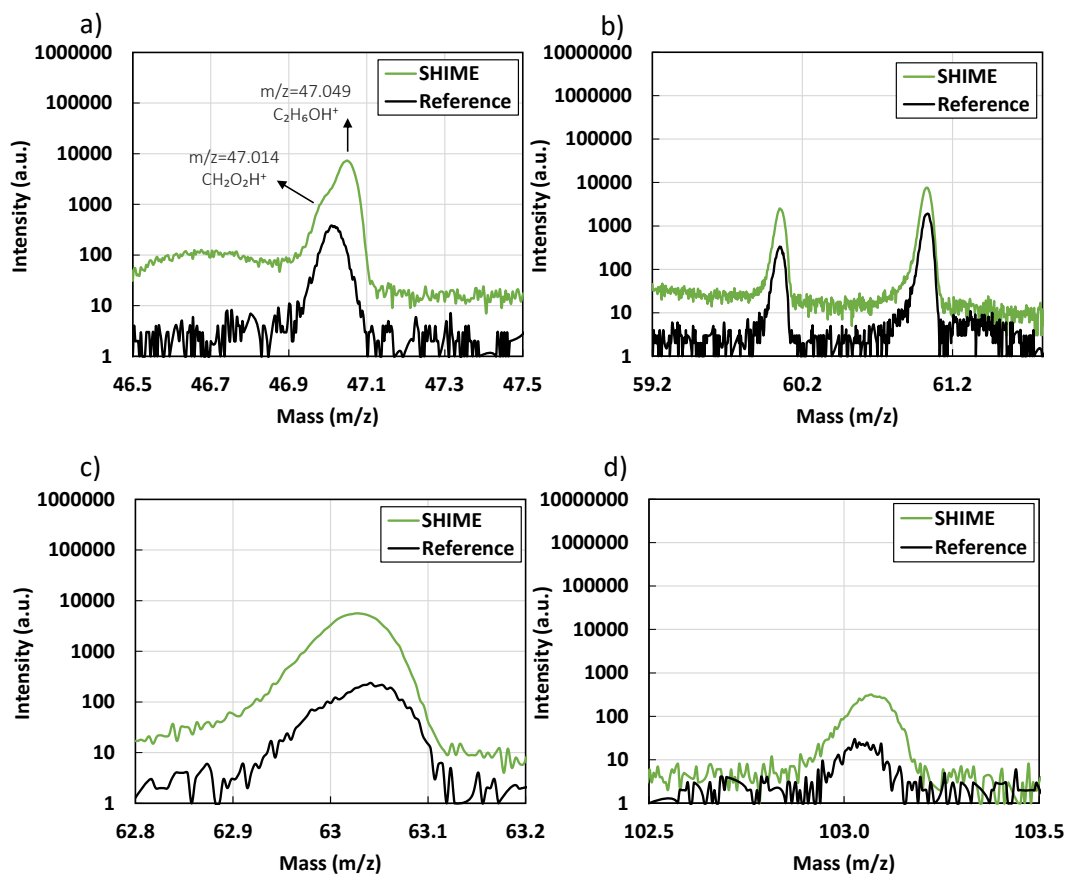

**Figure S5.** (a) formic acid  $CH_2O_2H^+$  and ethanol  $C_2H_6OH^+$  related peaks, (b) propylamine ( $C_3H_9NH^+$ ,  $m/z = 60$ ) and acetic acid ( $C_2H_4O_2H^+$ ,  $m/z = 61$ ) related peaks, (c) dimethyl sulfide ( $C_2H_6SH^+$ ,  $m/z = 63$ ) peak and (d) pentanoic acid ( $C_5H_{10}O_2H^+$ ,  $m/z = 103$ ).

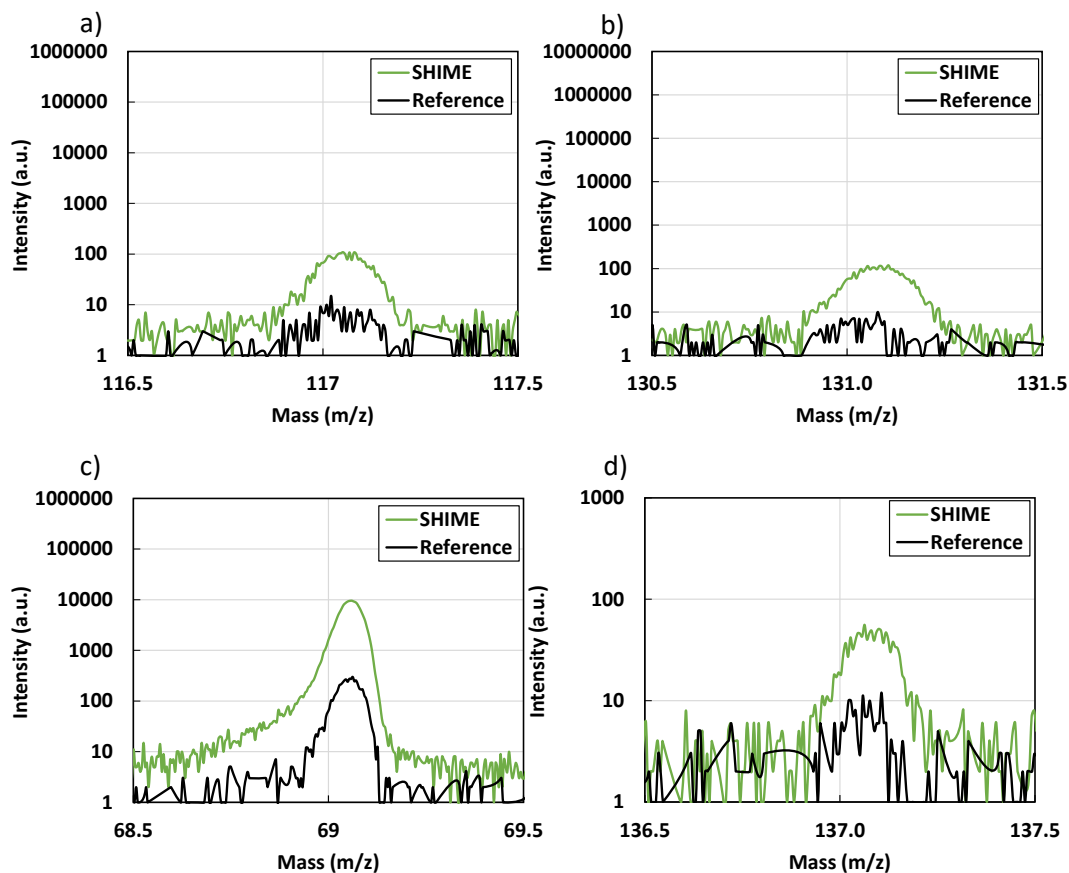

**Figure S6.** (a) hexanoic acid ( $C_6H_{12}O_2H^+$ ,  $m/z = 117$ ), (b) heptanoic acid ( $C_7H_{14}O_2H^+$ ,  $m/z = 131$ ), (c) isoprene ( $C_5H_8H^+$ ,  $m/z = 69$ ) and (d) pinene/limonene ( $C_{10}H_{16}H^+$ ,  $m/z = 137$ ) peaks

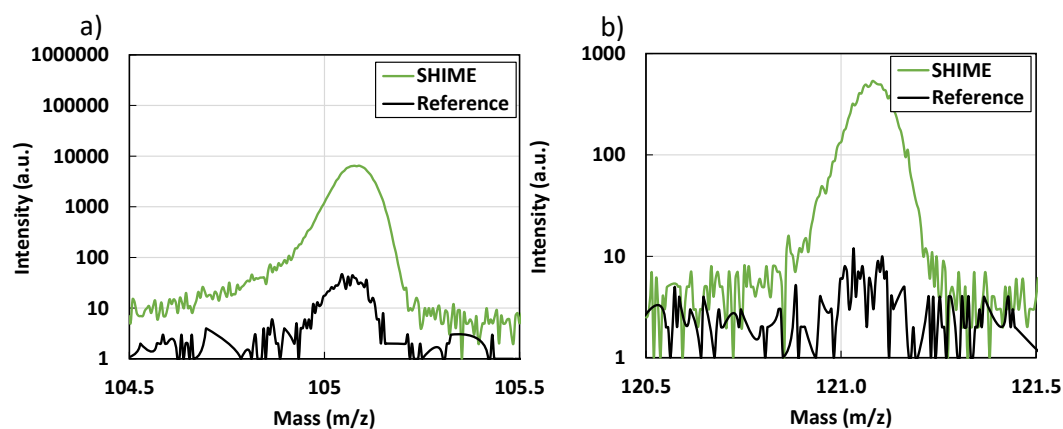

**Figure S7.** (a) styrene ( $C_8H_8H^+$ ,  $m/z = 105$ ) and (b) trimethyl benzene/ethyl toluene ( $C_9H_{12}H^+$ ,  $m/z = 121$ ) peaks
